# Supplementary material
Source: publisher figshare collection journal article supplement (https://tandf.figshare.com/articles/dataset/_/2074408)
Supplement: Supplementary file 1 [file 1]

JOURNAL OF VERTEBRATE PALEONTOLOGY

A re-evaluation of *Brachyprosopus broomi* and *Chelydontops altidentalis*, dicynodonts (Therapsida, Anomodontia) from the Middle Permian *Tapinocephalus* Assemblage Zone of the Karoo Basin, South Africa

KENNETH D. ANGIELCZYK,<sup>1\*</sup> BRUCE S. RUBIDGE,<sup>2</sup> MICHAEL O. DAY,<sup>2</sup> and FLORENCE LIN<sup>1</sup>

<sup>1</sup>Integrative Research Center, Field Museum of Natural History, 1400 South Lake Shore Drive,

<sup>1</sup>Chicago, Illinois 60605, U.S.A., [kangielczyk@fieldmuseum.org](mailto:kangielczyk@fieldmuseum.org), [flin8@illinois.edu](mailto:flin8@illinois.edu);

<sup>2</sup>Evolutionary Studies Institute, University of the Witwatersrand, Johannesburg, South Africa,

[Bruce.Rubidge@wits.ac.za](mailto:Bruce.Rubidge@wits.ac.za), [Michael.Day@wits.ac.za](mailto:Michael.Day@wits.ac.za)

\*Corresponding Author.

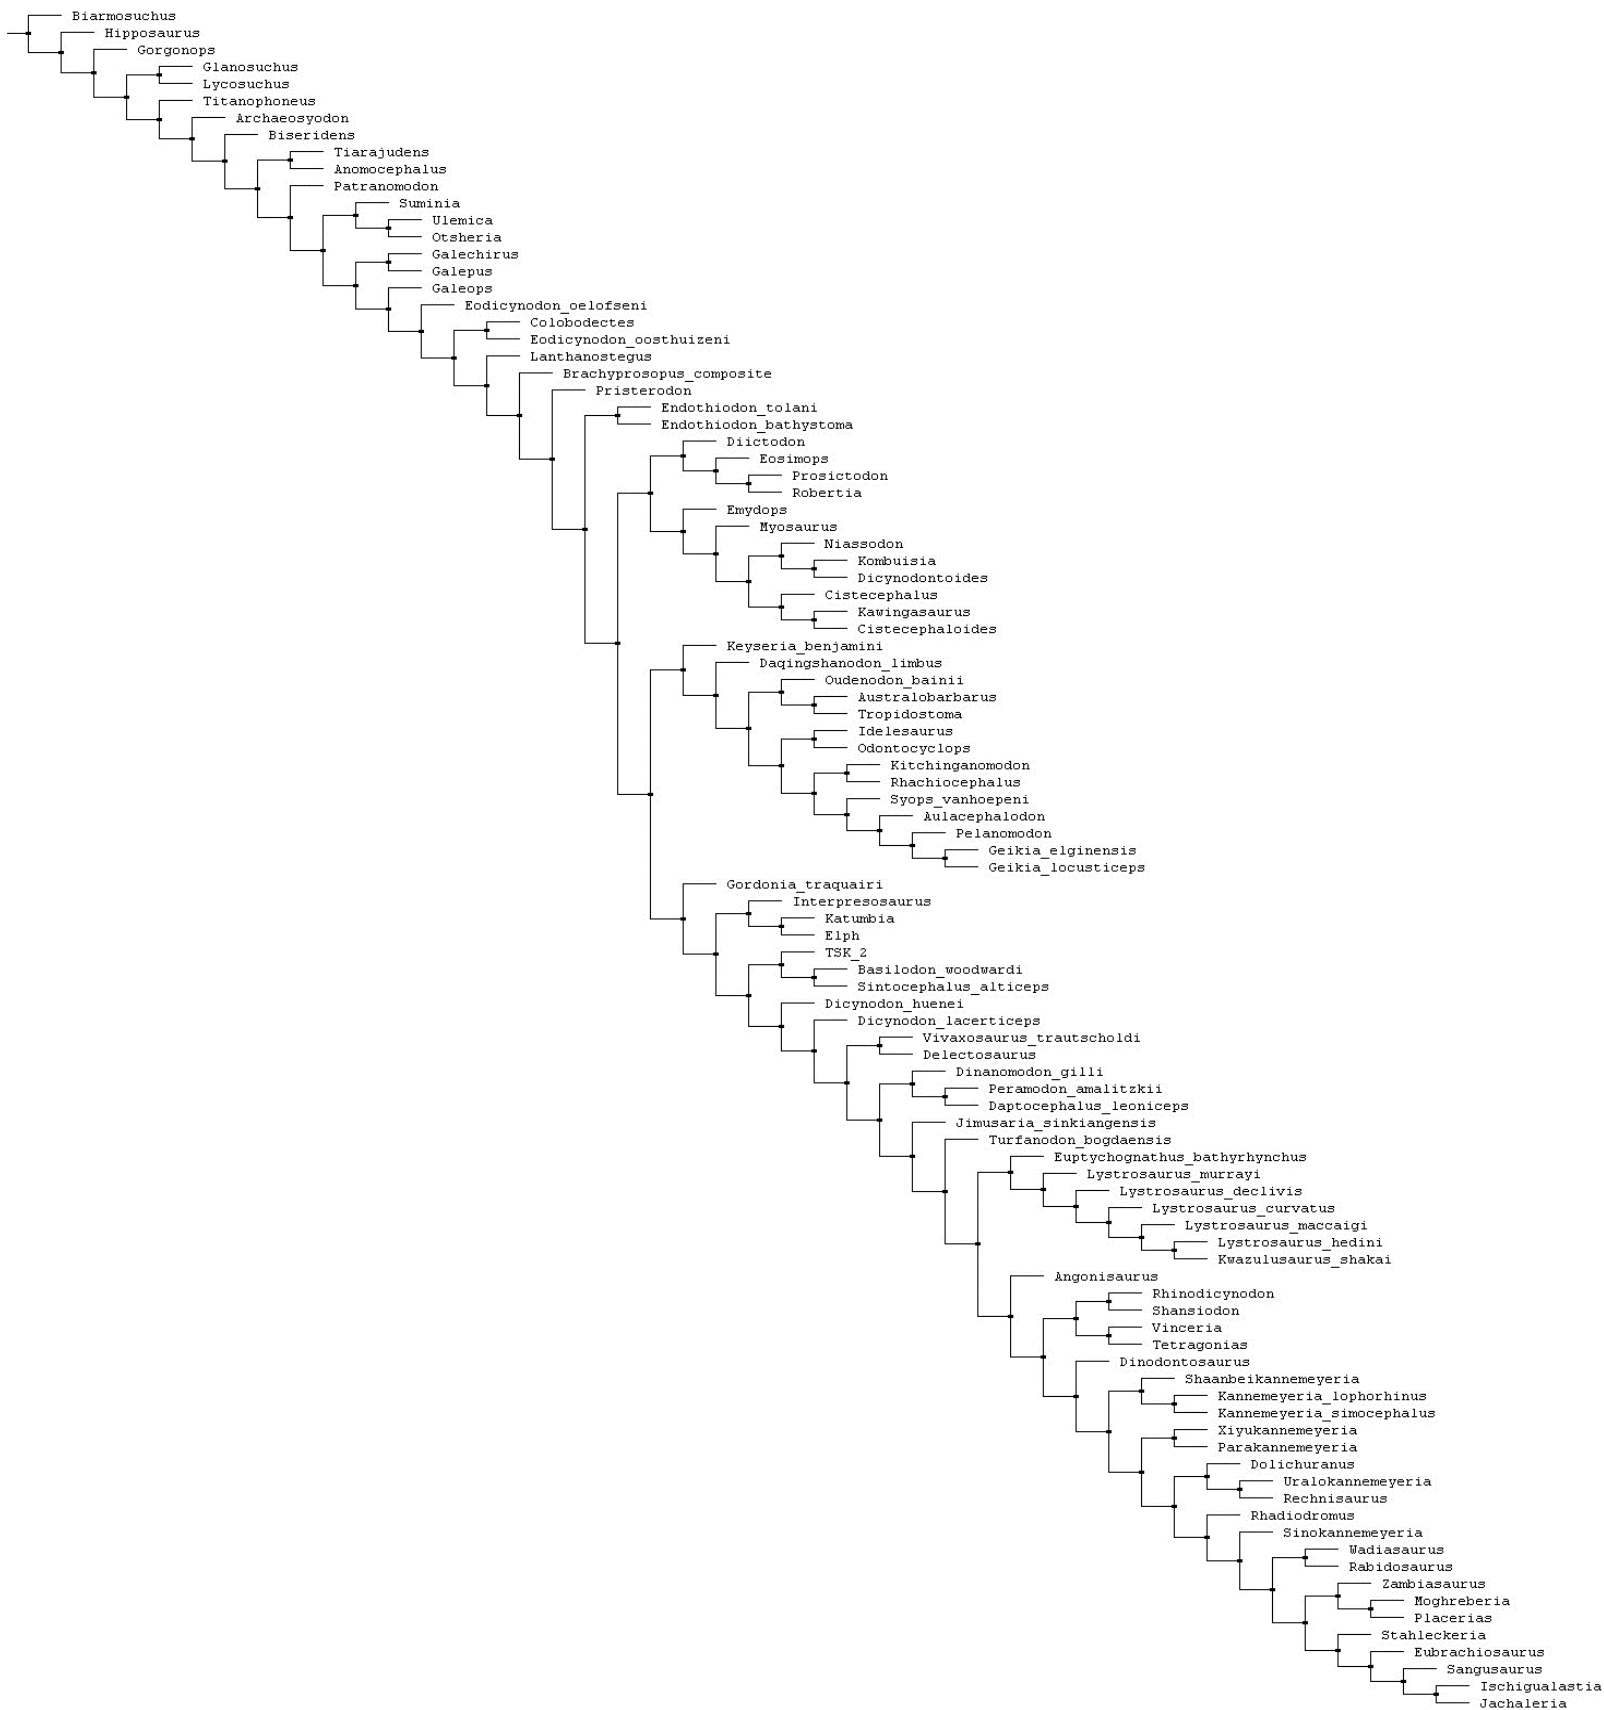

FIGURE S1. Complete cladogram from the phylogenetic analysis. Scores: 1031.219 steps, consistency
